# Supplementary material for: Structural basis for Ragulator functioning as a scaffold in membrane-anchoring of Rag GTPases and mTORC1
Source: PubMed Central journal article supplement (PMC5680233; doi:10.1038/s41467-017-01567-4), 2017-11-09
Supplement: 41467_2017_1567_MOESM1_ESM.pdf [file 41467_2017_1567_MOESM1_ESM.pdf]

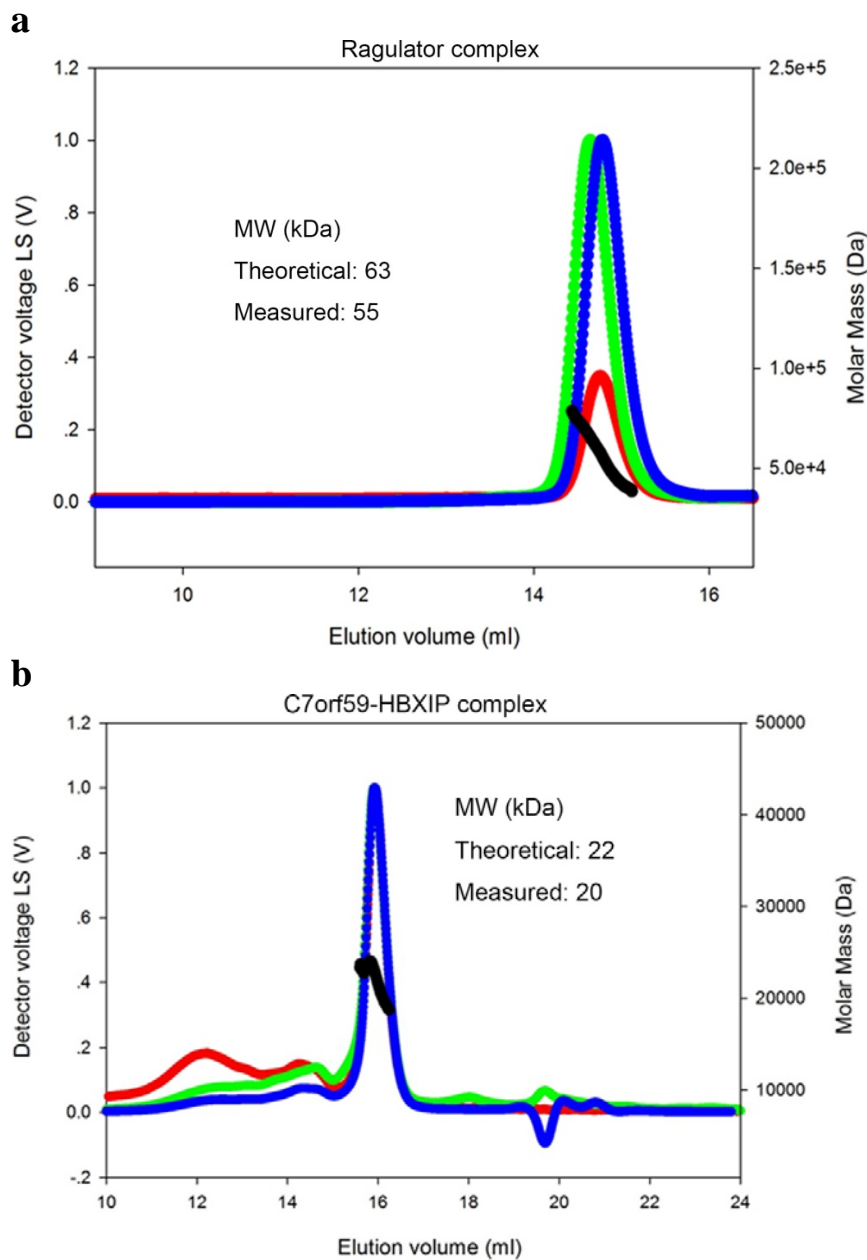

**Supplementary Figure 1.** Size-exclusion chromatography coupled with multi-angle light scattering (SEC-MALS) analysis of the Ragulator complex (p18<sup>14-161</sup>) (**a**) and the C7orf59-HBXIP heterodimer (**b**). The left and right vertical axes represent the refractive index reading and the molecular mass. Chromatograms show the readings from the light scattering at 90° (red), refractive index (blue), and UV (green) detectors. The black curves represent the calculated

molecular masses, and the average measured masses of the elution peaks of the Ragulator complex (p18<sup>14-161</sup>) and the C7orf59-HBXIP heterodimer are indicated, suggesting that both complexes exist as monomers in solution.

**a**

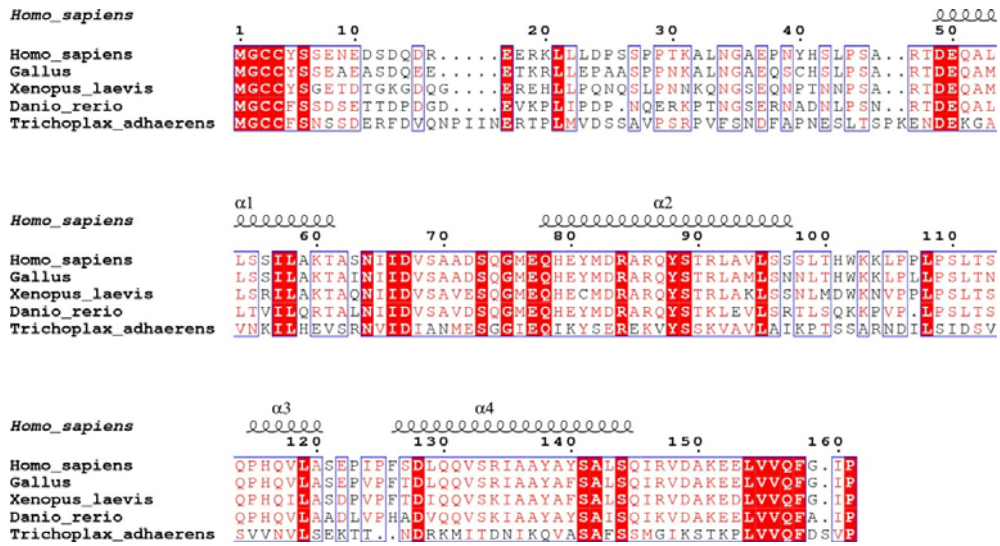

**b**

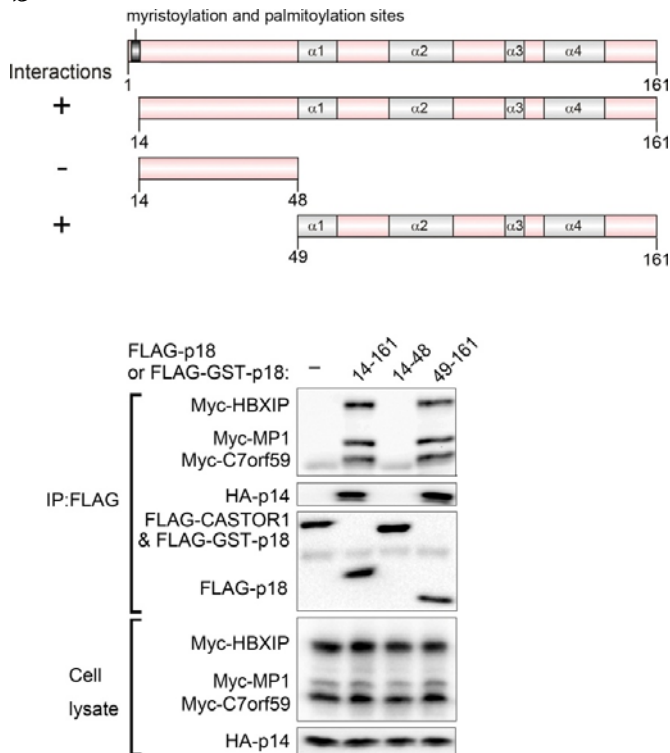

**Supplementary Figure 2.** Biochemical analysis of the interactions of different p18 variants with MP1/p14/HBXIP/C7orf59. (a) Sequence alignment of p18 from different species as analyzed by

ESPrpt 3.0<sup>1</sup>. The secondary structures ( $\alpha 2$ - $\alpha 4$ ) of p18 in the Ragulator complex are placed on the top of the alignment. Helix  $\alpha 1$  was predicted by the PredictProtein server<sup>2</sup>. **(b)** Co-IP assays examining the interaction of the p18 deletion mutants with the other four Ragulator components. The N-terminal truncation of p18 (p18<sup>49-161</sup>) exhibits similar binding affinity with the other components as p18<sup>14-161</sup>.

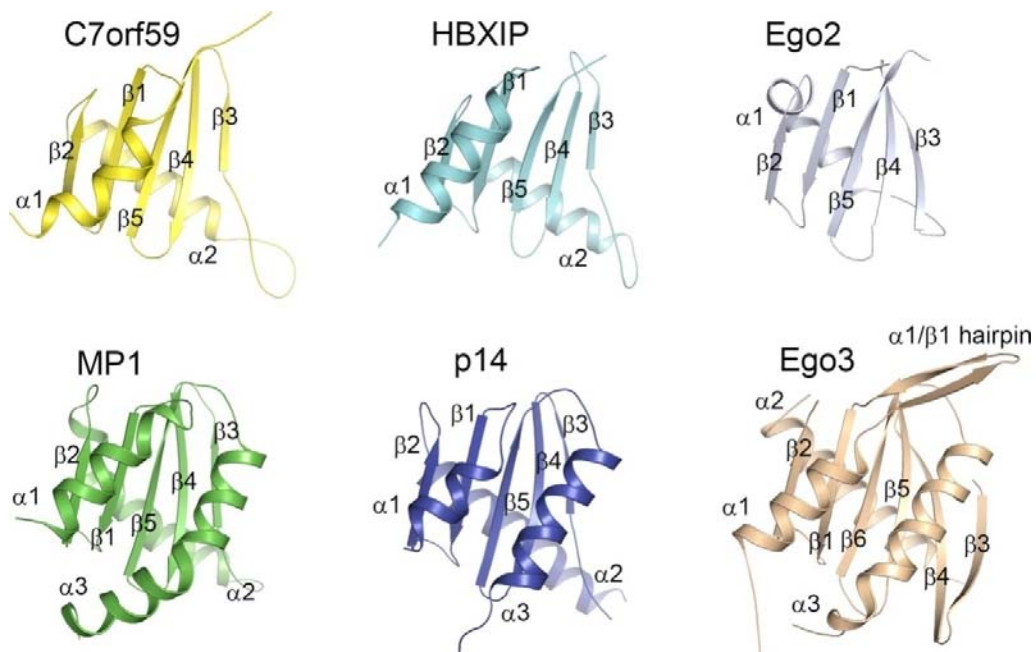

**Supplementary Figure 3.** Structures of the Roadblock domain-containing components in the Regulator and EGO-TC complexes.

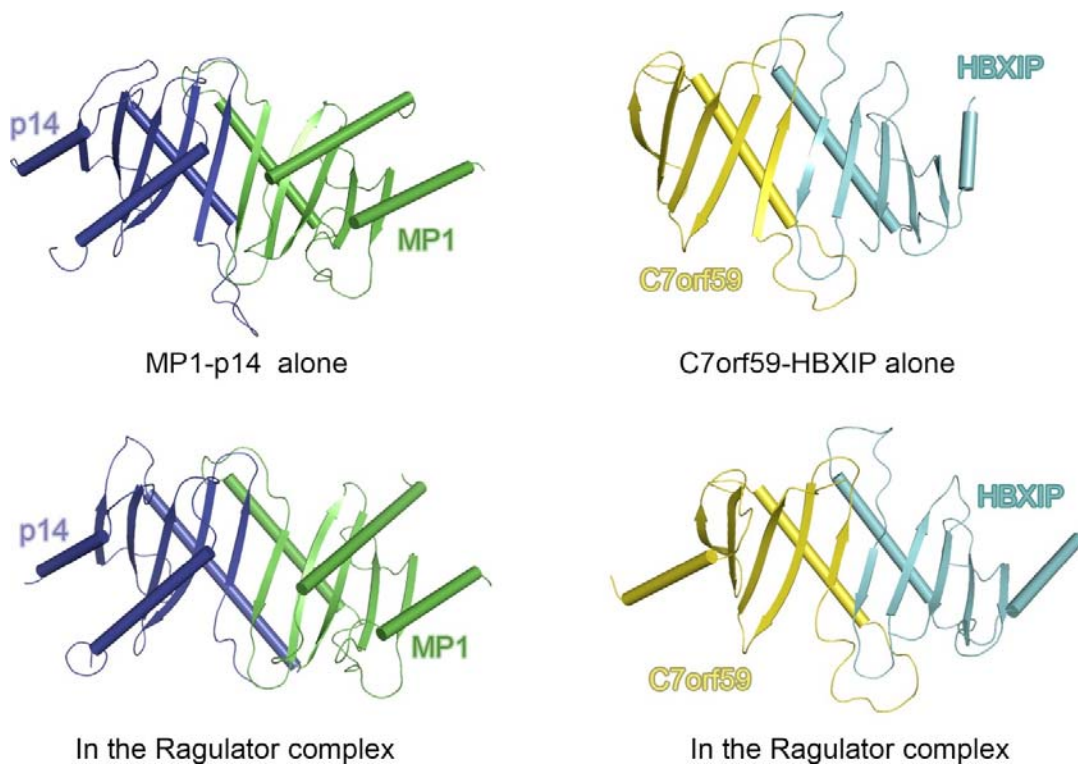

**Supplementary Figure 4.** Structural comparison of the C7orf59-HBXIP and MP1-p14 heterodimers alone and those in the Ragulator complex. The structure of Mp1-p14 (PDB code 1VET) is reported previously<sup>3</sup>. The color scheme is the same as in Figure 1.

**a**

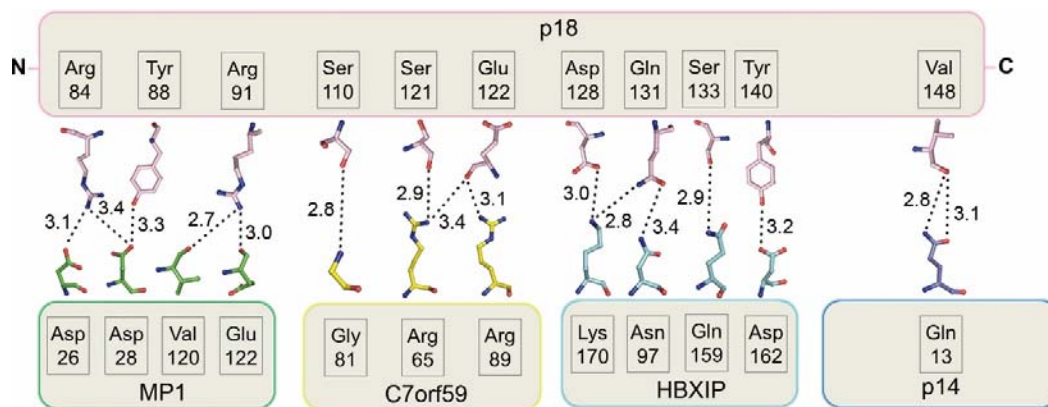

**b**

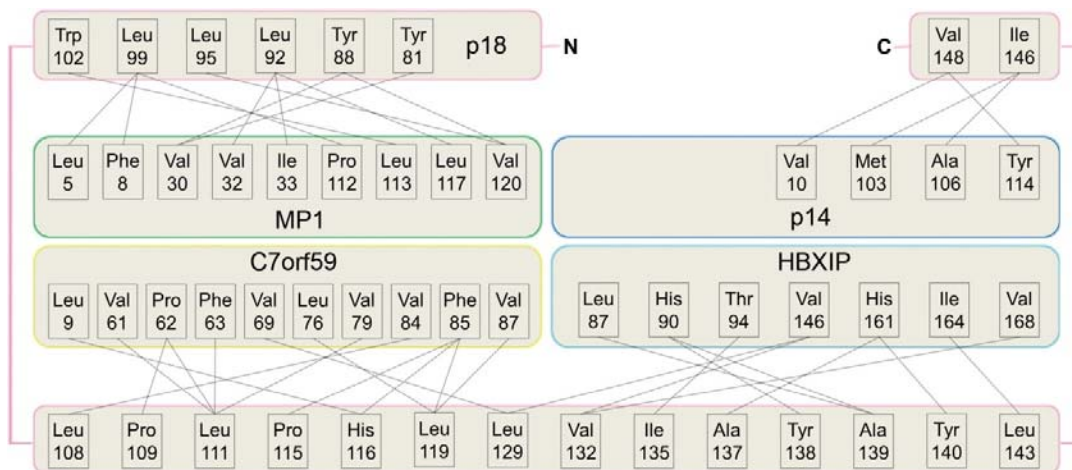

**Supplementary Figure 5.** Interactions of p18 with MP1/p14/HBXIP/C7orf59. Schematic diagrams showing the hydrophilic interactions (**a**) and hydrophobic interactions (**b**). The color scheme is the same as in Figure 2a.

**a**

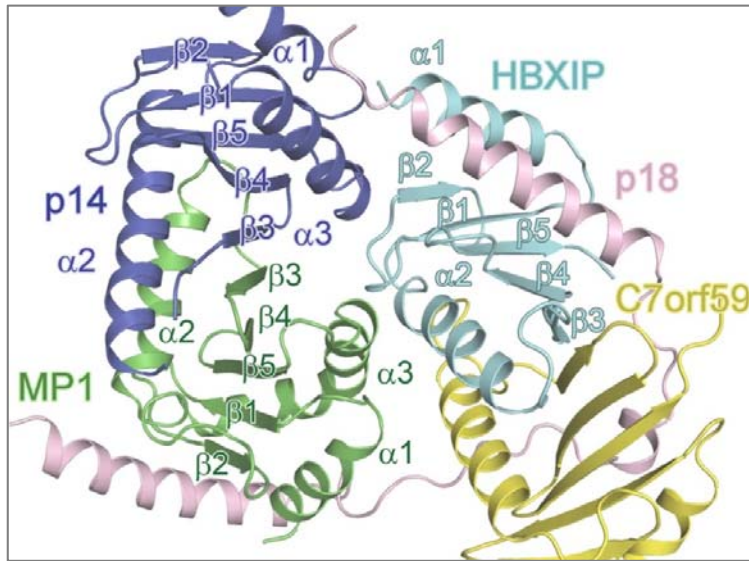

**b**

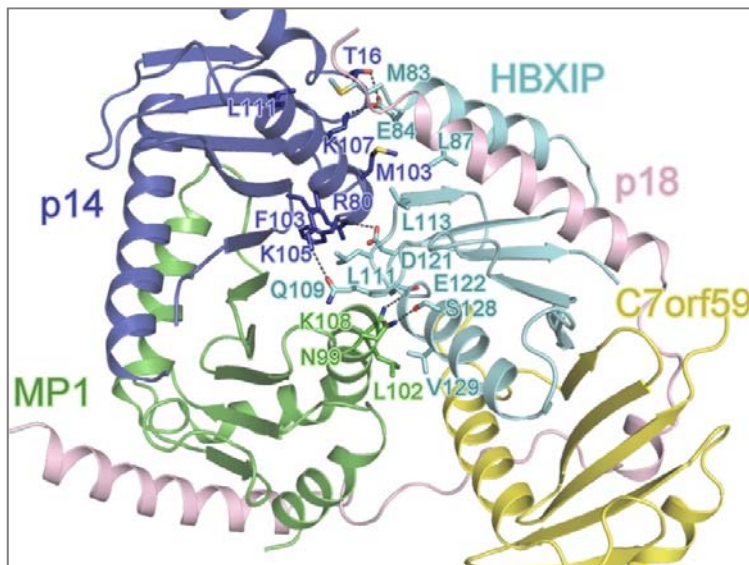

**Supplementary Figure 6.** Interactions between the MP1-p14 and HBXIP-C7orf59 heterodimers. Overview (a) and detailed view (b) of the interactions between the two heterodimers. The interaction interface is mediated by the structure elements of MP1, p14 and HBXIP but not C7orf59.



**a**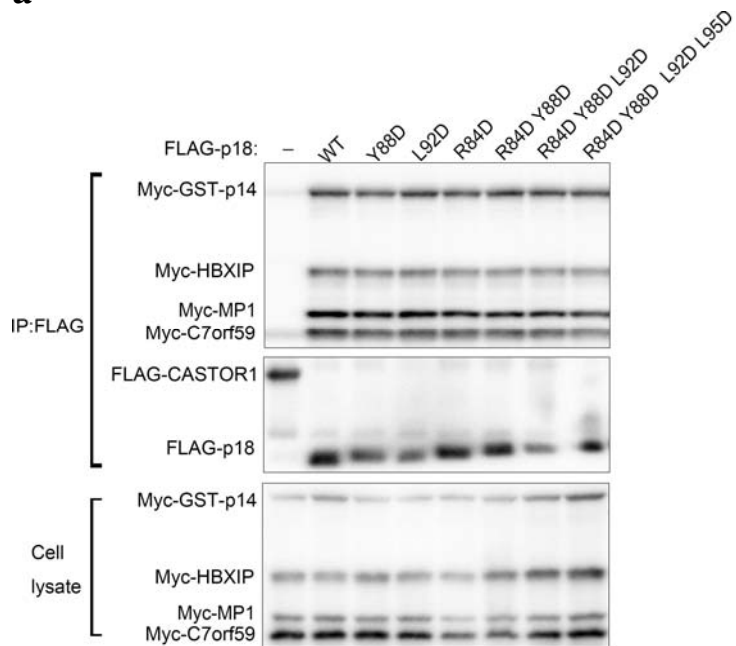**b**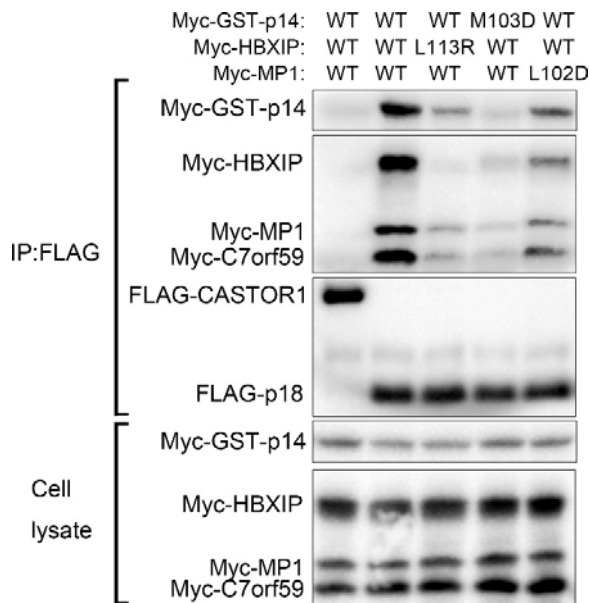

**Supplementary Figure 7.** Mutational analyses of the interactions among different Ragulator components. **(a)** Co-IP assays examining the interactions between p18 and MP1. All the mutations on the MP1-binding region of p18 do not impair the interactions. **(b)** Co-IP assays

examining the interactions between the MP1-p14 and C7orf59-HBXIP heterodimers. All the mutations on p14, HBXIP or MP1 weaken the interactions.

**a**

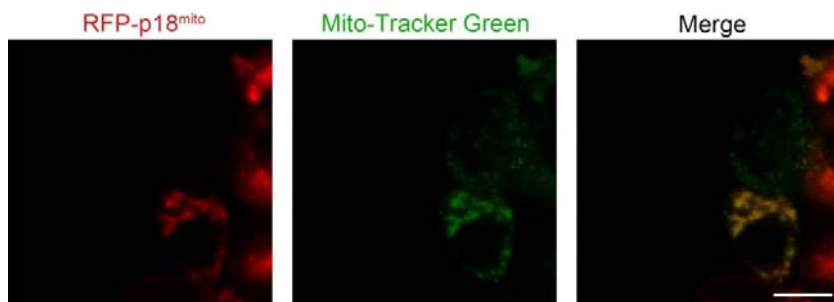

**b**

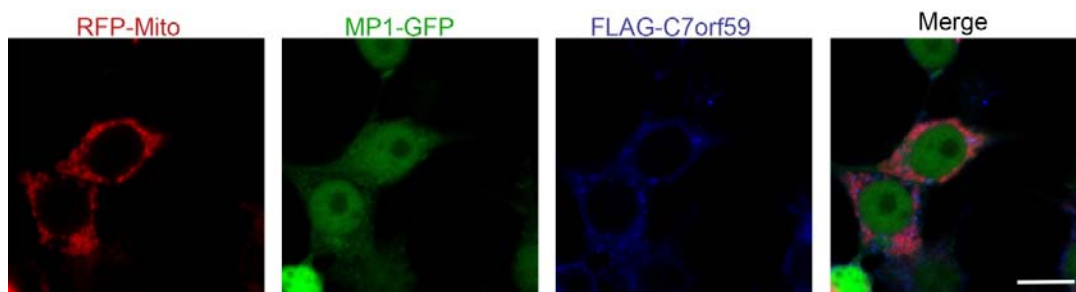

**Supplementary Figure 8.** Immunofluorescence microscopy analysis to examine the localization of p18<sup>mito</sup>. p18<sup>mito</sup> was constructed with the deletion of the N-terminal lipidation region (residues 1-13) and the fusion of the mitochondrial transmembrane region of OMP25 at the C-terminus. Scale bar represents 10  $\mu\text{m}$ . (a) p18<sup>mito</sup> was co-localized with the mitochondrial marker Mito-tracker Green. (b) RFP-Mito failed to recruit MP1 and C7orf59 in cells over-expressing MP1, p14, C7orf59 and HBXIP.

**a**

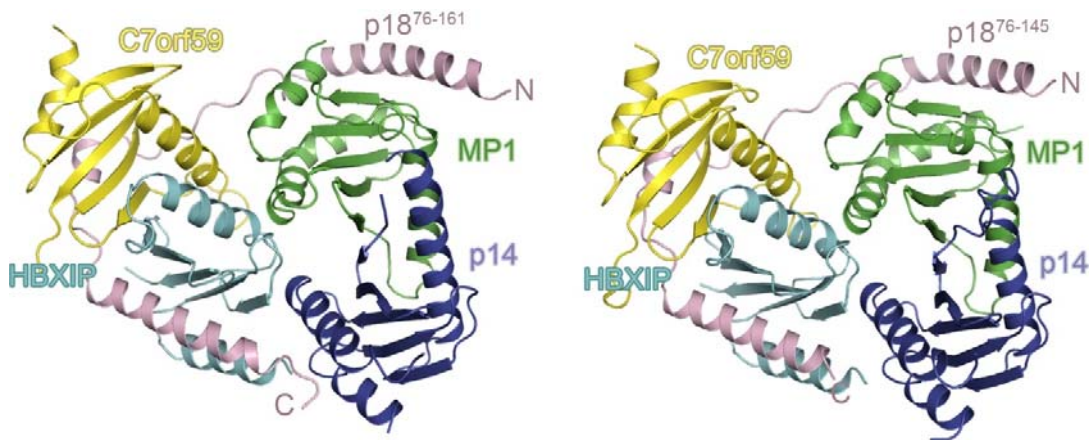

**b**

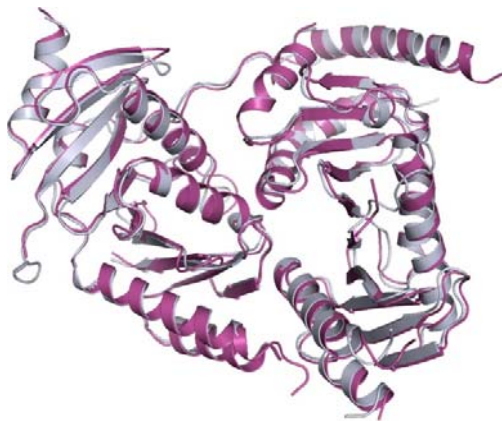

Ragulator complex (p18<sup>76-145</sup>)

Ragulator complex (p18<sup>49-161</sup>)

**Supplementary Figure 9.** Structural comparison of the Ragulator (p18<sup>49-161</sup>) and Ragulator (p18<sup>76-145</sup>) complexes. **(a)** Overall structures of the Ragulator (p18<sup>49-161</sup>) and Ragulator (p18<sup>76-145</sup>) complexes. **(b)** Superposition of the Ragulator (p18<sup>49-161</sup>) and Ragulator (p18<sup>76-145</sup>) structures, which are colored in purple and gray, respectively, yielding an RMSD of 1.2 Å for 478 C $\alpha$  atoms.

**a**

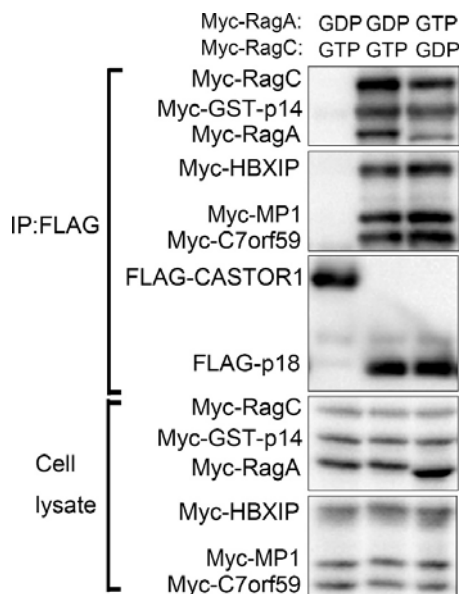

**b**

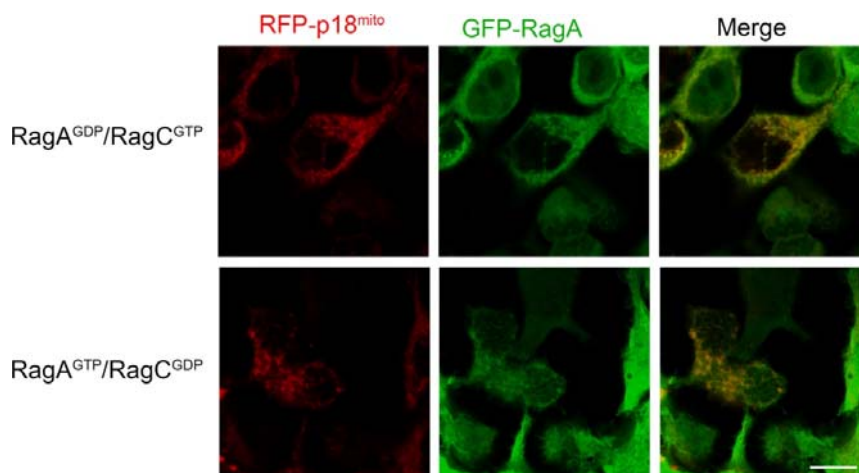

**Supplementary Figure 10.** The Rag GTPases interact with the Ragulator in a nucleotide-bound state independent manner. Co-IP assays (**a**) and immunofluorescence microscopy analyses (**b**) were performed to analyze the interactions between the Ragulator and the dominant active RagA<sup>GTP</sup>-RagC<sup>GDP</sup> or dominant inactive RagA<sup>GDP</sup>-RagC<sup>GTP</sup>. Scale bar represents 10  $\mu$ m.

**a**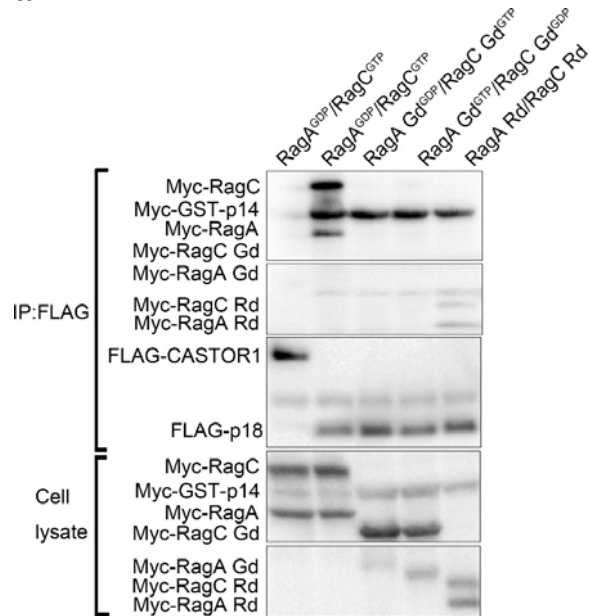**b**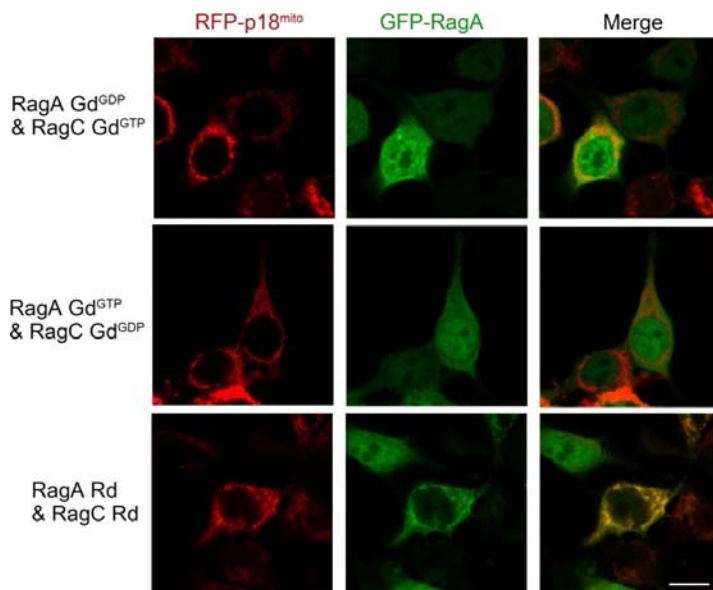

**Supplementary Figure 11.** The Rag GTPases interact with the Ragulator via the C-terminal Roadblock domains. Co-IP assays (**a**) and immunofluorescence microscopy analyses (**b**) were performed to analyze the interactions between the Ragulator and the Roadblock domains (Rd) or GTPase domains (Gd) of Rag GTPases. Scale bar represents 10  $\mu\text{m}$ .

**a**

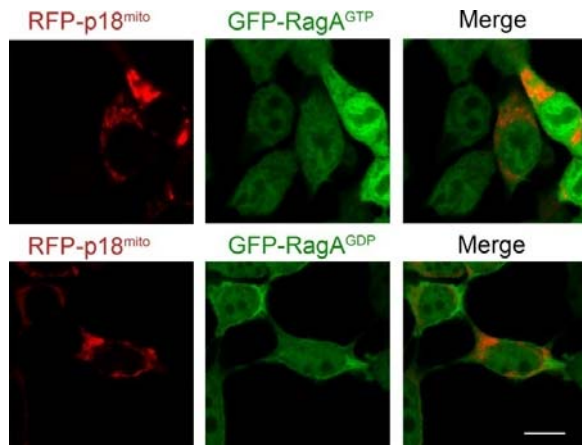

**b**

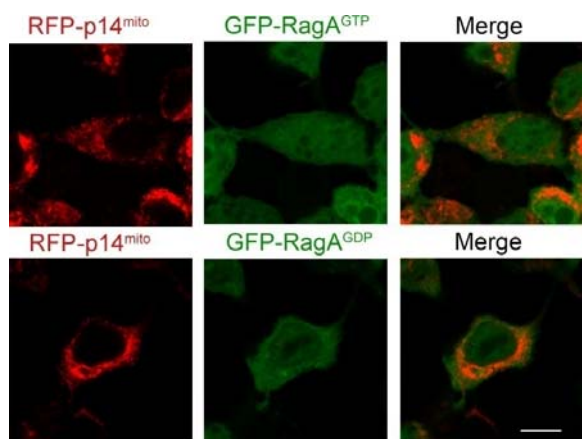

**c**

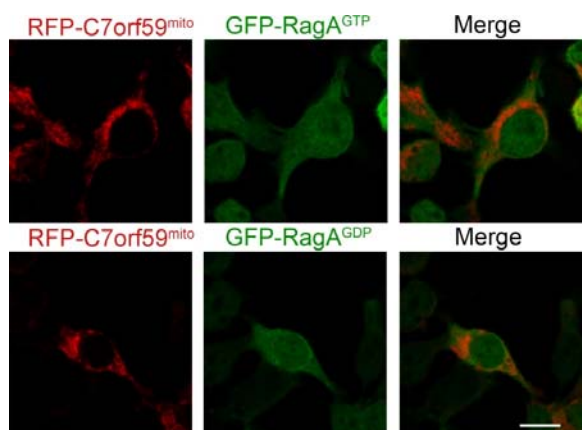

**Supplementary Figure 12.** Immunofluorescence microscopy analyses of the interactions of p18<sup>mito</sup>, p14<sup>mito</sup>, and C7orf59<sup>mito</sup> with the Rag GTPases. Scale bar represents 10  $\mu$ m. **(a)** p18 alone failed to recruit RagA<sup>GTP</sup> or RagA<sup>GDP</sup> in cells over-expressing p18<sup>mito</sup>, RagA<sup>GTP</sup>-RagC<sup>GDP</sup> or RagA<sup>GDP</sup>-RagC<sup>GTP</sup>. **(b)** MP1-p14 alone failed to recruit RagA<sup>GTP</sup> or RagA<sup>GDP</sup> in cells over-expressing MP1, p14<sup>mito</sup>, RagA<sup>GTP</sup>-RagC<sup>GDP</sup> or RagA<sup>GDP</sup>-RagC<sup>GTP</sup>. **(c)** HBXIP-C7orf59 alone failed to recruit RagA<sup>GTP</sup> or RagA<sup>GDP</sup> in cells over-expressing HBXIP, C7orf59<sup>mito</sup>, RagA<sup>GTP</sup>-RagC<sup>GDP</sup> or RagA<sup>GDP</sup>-RagC<sup>GTP</sup>.



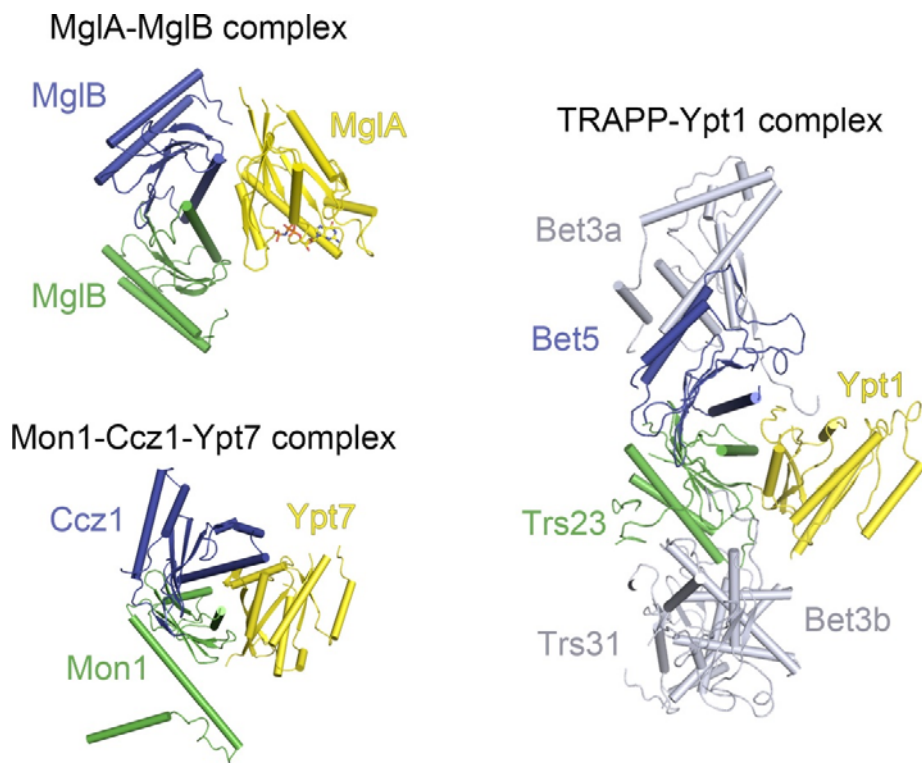

**Supplementary Figure 13.** Ribbon representations of three Roadblock or Longin domain-containing complexes, namely the MglA-MglB complex (PDB code 3T12), the Mon1-Ccz1-Ypt7 complex (PDB code 5LDD), and the TRAPP-Ypt1p complex (PDB code 3CUE).

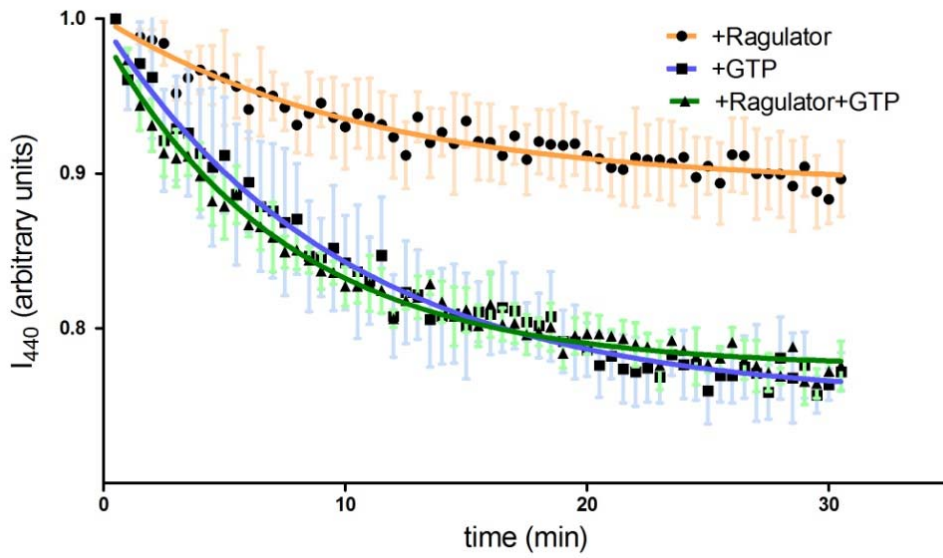

**Supplementary Figure 14.** Kinetics of mantGDP release from mantGDP-bound RagA-RagC<sup>D181N</sup> in the presence of 2.0  $\mu$ M Ragulator (yellow), or 10.0  $\mu$ M GTP (blue), or 2.0  $\mu$ M Ragulator and 10.0  $\mu$ M GTP (green). Each value represents the normalized mean  $\pm$  deviation of three independent measurements.

**a**

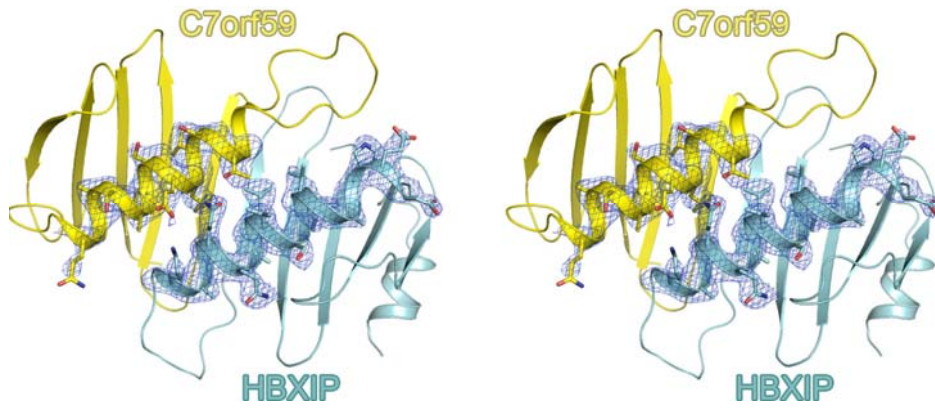

**b**

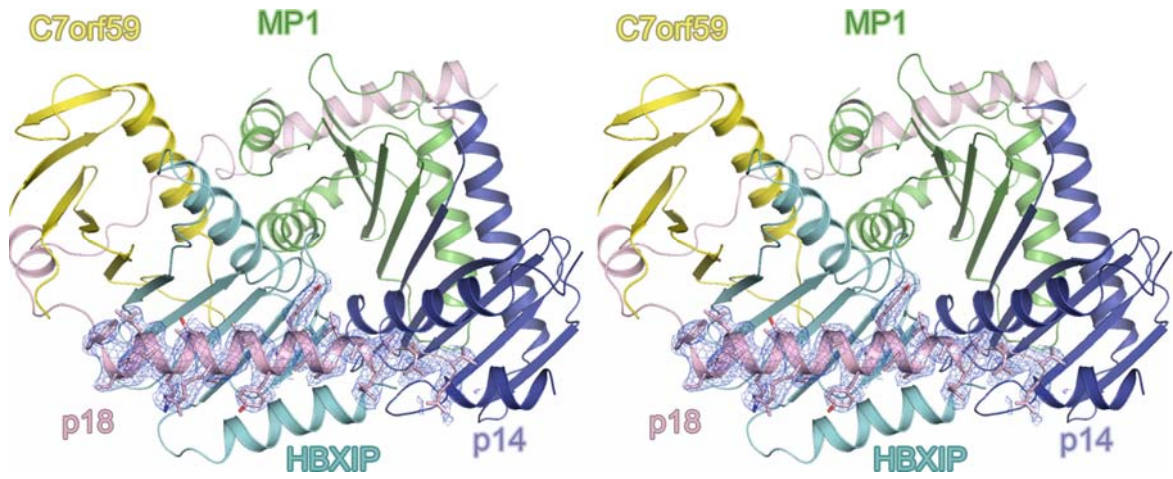

**c**

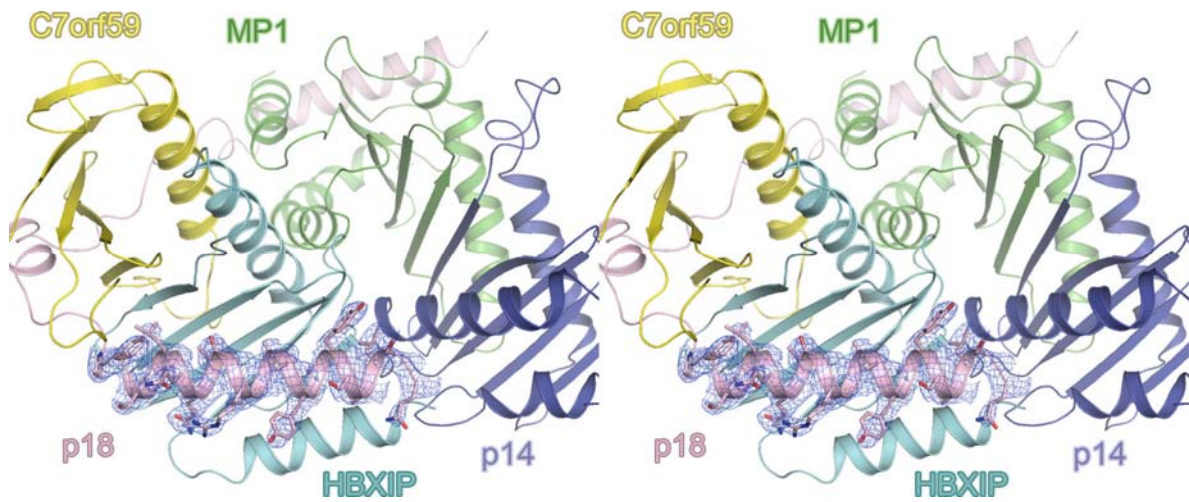

**Supplementary Figure 15.** Stereoviews of electron density maps. **(a)** Composite 2Fo-Fc omit map (contoured at  $1\sigma$ ) for the  $\alpha 2$  helices of the HBXIP-C7orf59 complex. **(b)** Composite 2Fo-Fc omit map (contoured at  $1\sigma$ ) for helix  $\alpha 4$  and the C-terminal loop of p18 in the Ragulator complex (p18<sup>49-161</sup>). **(c)** Composite 2Fo-Fc omit map (contoured at  $1\sigma$ ) for helix  $\alpha 4$  of p18 in the Ragulator complex (p18<sup>49-145</sup>).

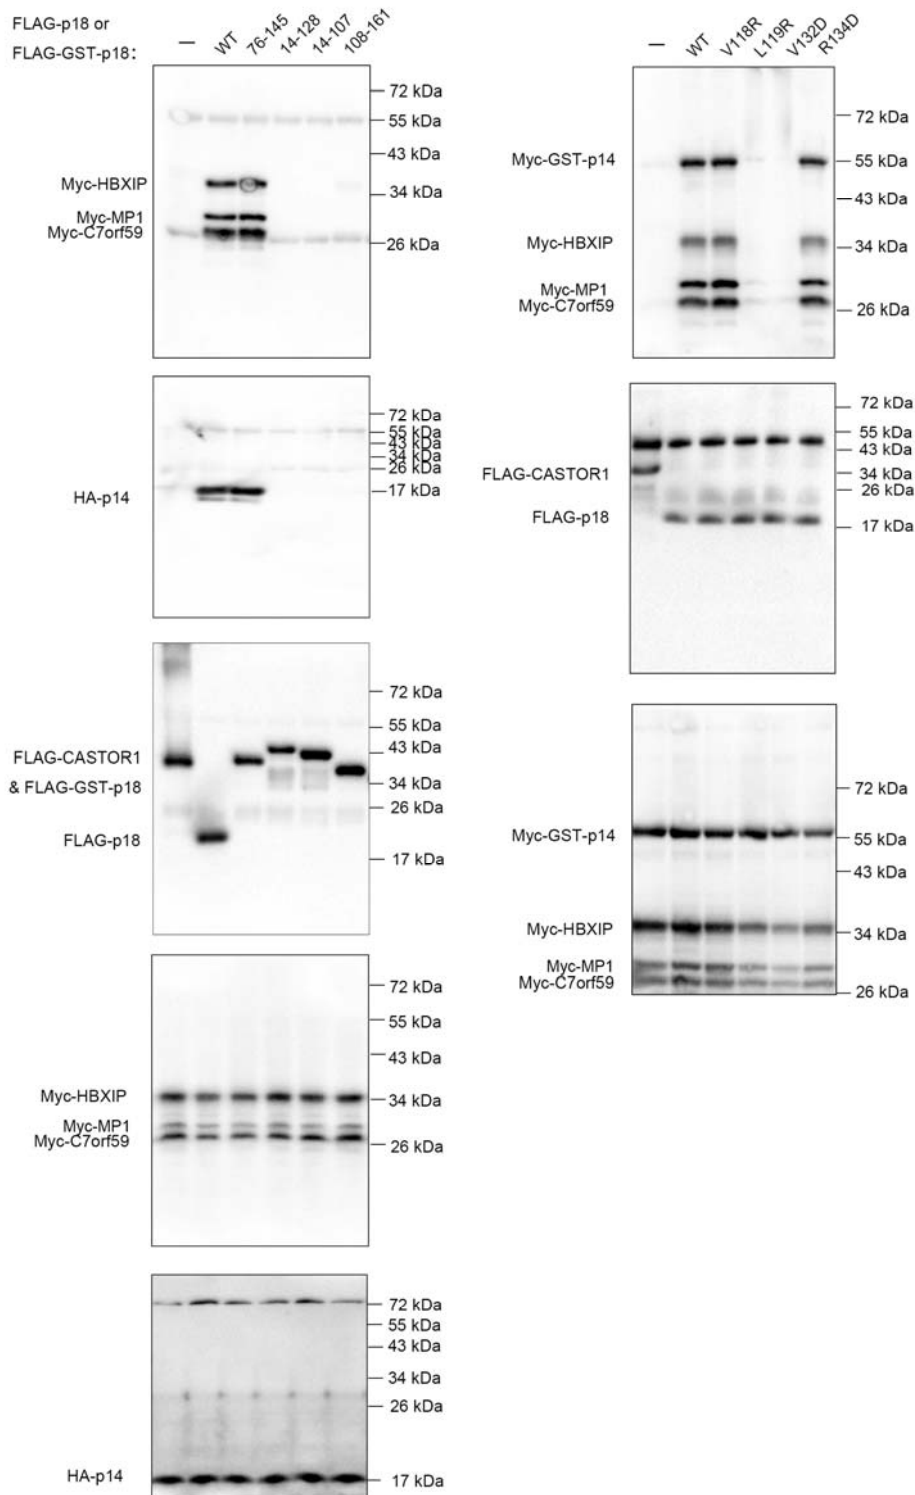

Full-length immunoblots for Figure 3a and 3b

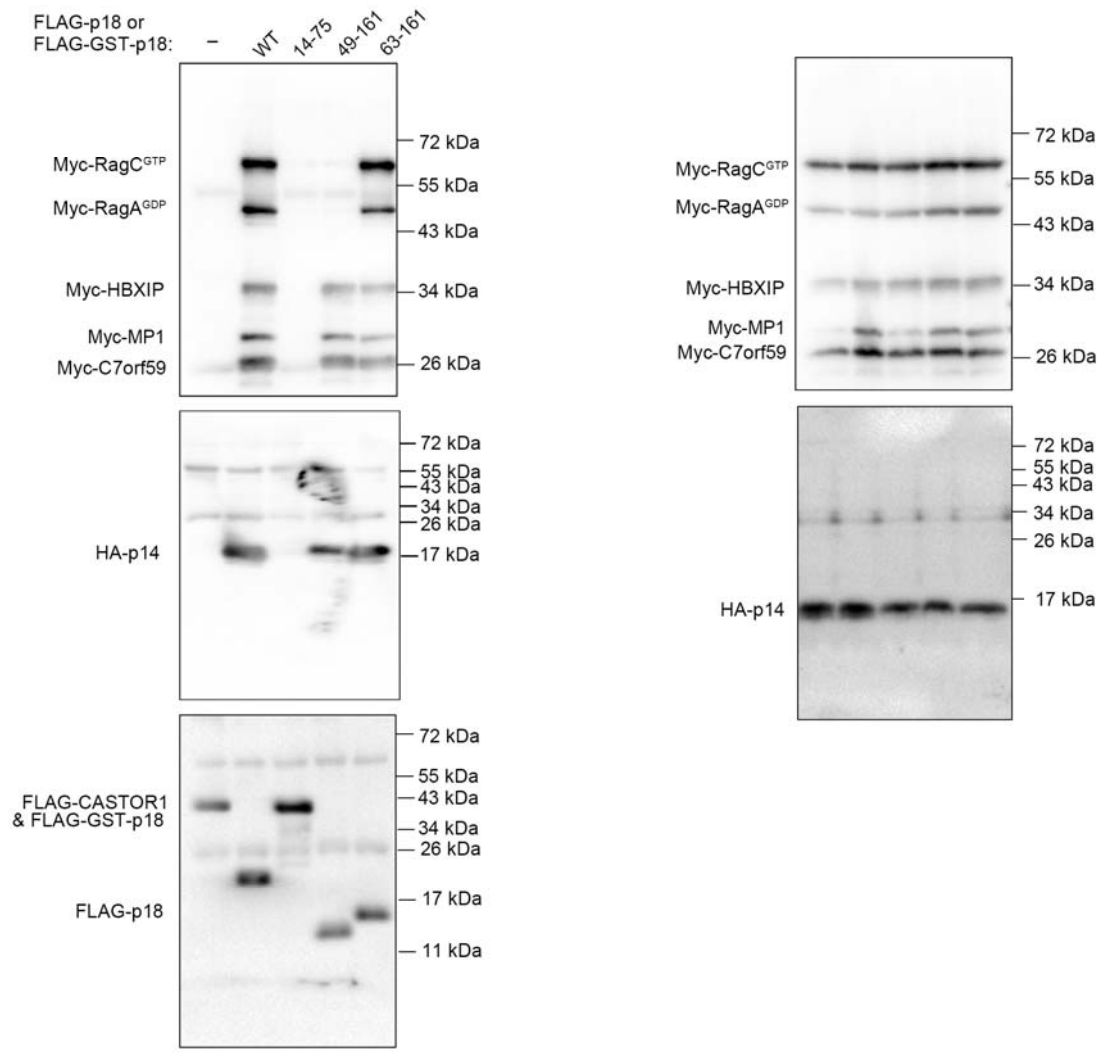

Full-length immunoblots for Figure 4a

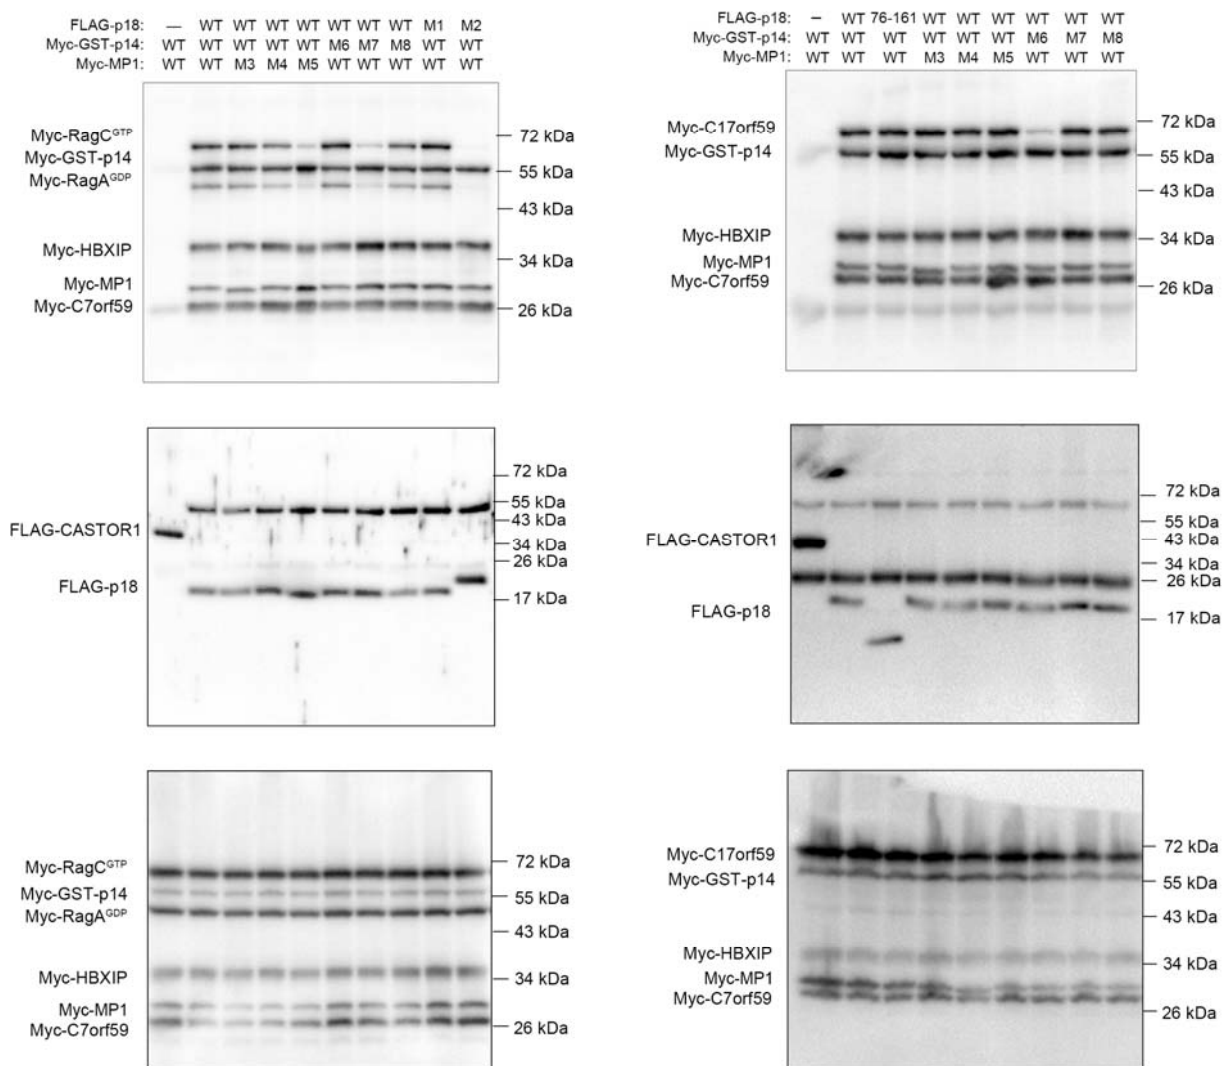

Full-length immunoblots for Figure 4c and 4e

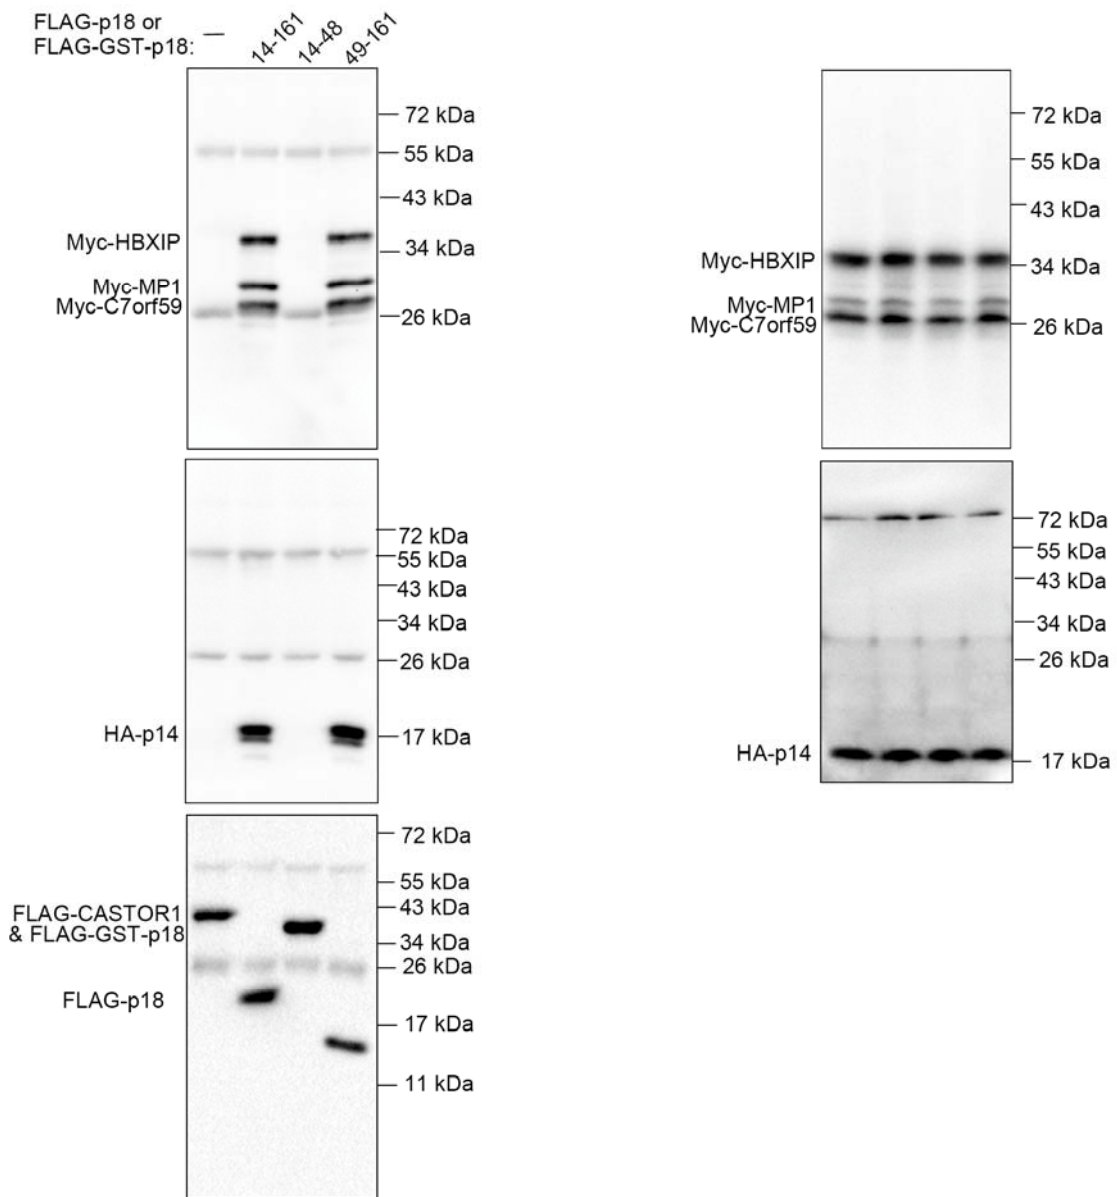

Full-length immunoblots for Supplementary Figure 2b



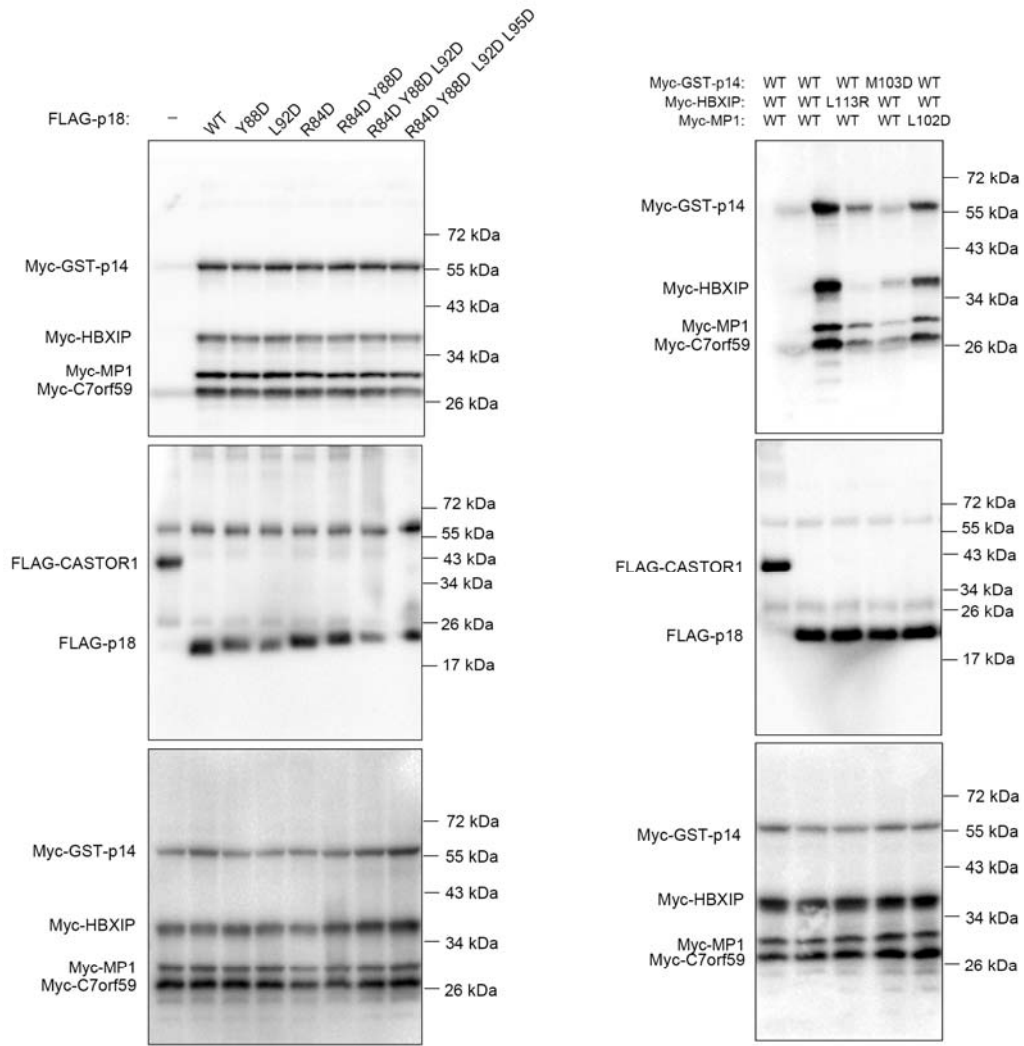

Full-length immunoblots for Supplementary Figure 7a and 7b

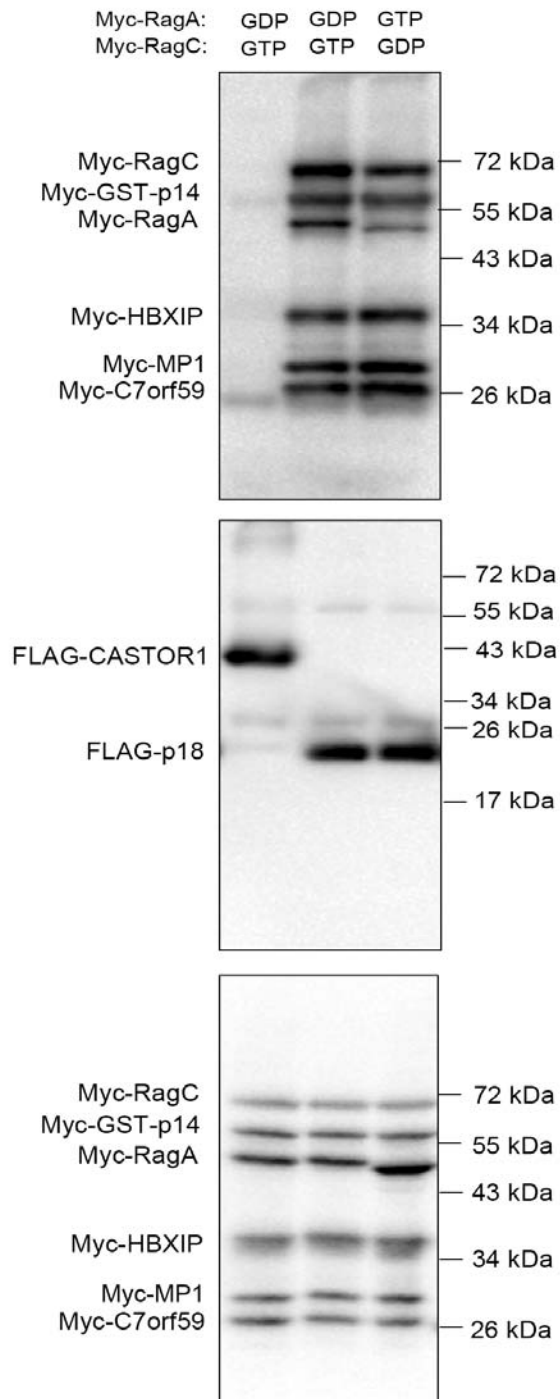

Full-length immunoblots for Supplementary Figure 10a

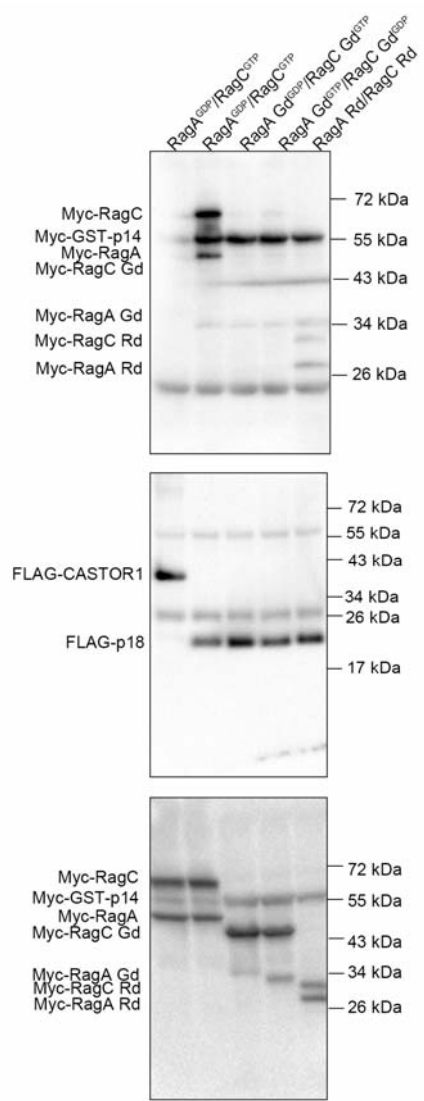

Full-length immunoblots for Supplementary Figure 11a

**Supplemental Figure 16.** Uncropped western blot images.

**Supplementary Table 1. Design of mutants**

| Mutant | Mutation            | Location                                         |
|--------|---------------------|--------------------------------------------------|
| M1     | D49A/E50A           | $\alpha$ 1 of p18                                |
| M2     | I57D/L58D           | $\alpha$ 1 of p18                                |
| M3     | E42A/H43A/R46A      | $\beta$ 2- $\alpha$ 2 loop and $\alpha$ 2 of MP1 |
| M4     | L55D/D58A           | $\alpha$ 2 of MP1                                |
| M5     | Q59A/K62D           | $\alpha$ 2 of MP1                                |
| M6     | D41A/R43A           | $\alpha$ 2 of p14                                |
| M7     | V44D/A47D           | $\alpha$ 2 of p14                                |
| M8     | R58A/N59A/N61A/Q62A | $\alpha$ 2 of p14                                |

**Supplementary Table 2. Summary of primers used in this study**

| <b>gene</b>             | <b>vector</b> | <b>primer sequence</b> |                                         |
|-------------------------|---------------|------------------------|-----------------------------------------|
| MPI                     | pET-Duet-1    | Forward (5'-3')        | ATATCCATGGCGGATGACCTAAAGC               |
|                         |               | Reverse (5'-3')        | ATATAAGCTTTTAAGAACTTCCACAACCTGTCTC      |
| p14                     | pET-Duet-1    | Forward (5'-3')        | ATATCATATGCTGCGCCCAAG                   |
|                         |               | Reverse (5'-3')        | TATACTCGAGTTAAGATGCCGCCACTTG            |
| p18 <sup>14-161</sup>   | pET-28a-SUMO  | Forward (5'-3')        | ATATGGATCCCAGGACCGAGAGGAGCG             |
|                         |               | Reverse (5'-3')        | ATATCTCGAGTCATGGGATCCCAAACCTGTAC        |
| p18 <sup>49-161</sup>   | pET-28a-SUMO  | Forward (5'-3')        | ATATGGATCCGATGAGCAGGCCCTGTCTC           |
|                         |               | Reverse (5'-3')        | ATATCTCGAGTCATGGGATCCCAAACCTGTAC        |
| p18 <sup>76-145</sup>   | pET-28a-SUMO  | Forward (5'-3')        | TATAGGATCCATGGAGCAGCATGAGTACATG         |
|                         |               | Reverse (5'-3')        | ATATCTCGAGTCACTGAGAAAGTGCCTGTAGGC<br>A  |
| C7orf59                 | pET-28a       | Forward (5'-3')        | ATATCCATGGGAATGACTTCTGCGCTGA            |
|                         |               | Reverse (5'-3')        | ATATCTCGAGTCAGACATCAATGGGCTCC           |
| HBXIP <sup>83-173</sup> | pET-Duet-1    | Forward (5'-3')        | ATATCCATGGAGGCGACCTTGGAGC               |
|                         |               | Reverse (5'-3')        | ATATCTCGAGTCAAGAGGCCATTTTGTGCAC         |
| RagC                    | pET-Duet-1    | Forward (5'-3')        | ATATCCATGGTCCCTGCAGTACGGG               |
|                         |               | Reverse (5'-3')        | ATATAAGCTTCTAGATGGCGTTTCGTGGC           |
| RagA                    | pET-Duet-1    | Forward (5'-3')        | ATATCATATGCCAAATACAGCCATGAAGAA          |
|                         |               | Reverse (5'-3')        | TATACTCGAGTCAACGCATAAGGAGACTGTGC        |
| p18 <sup>14-161</sup>   | pcDNA-FLAG    | Forward (5'-3')        | CGCGGATCCTGCAGGACCGAGAGGAGCGG           |
|                         |               | Reverse (5'-3')        | CCGCTCGAGTCATGGTATCCCAAACCTGTAC         |
| p18 V118R               | pcDNA-FLAG    | Forward (5'-3')        | CAGCCAGCCCCACCAACGGCTGGCCAGTGAGCCC      |
|                         |               | Reverse (5'-3')        | GGGCTCACTGGCCAGCCGTTGGTGGGGCTGGCTG      |
| p18 L119R               | pcDNA-FLAG    | Forward (5'-3')        | CCAGCCCCACCAAGTGCGGGCCAGTGAGCCCATC      |
| p18 L119R-Mito          | pmRFP-C1      | Reverse (5'-3')        | GATGGGCTCACTGGCCCCGCACTTGGTGGGGCTGG     |
| p18 V132D               | pcDNA-FLAG    | Forward (5'-3')        | CTCTGATTTGCAGCAGGACTCCAGGATAGCTGC       |
|                         |               | Reverse (5'-3')        | GCAGCTATCCTGGAGTCCTGCTGCAAATCAGAG       |
| p18 R134D               | pcDNA-FLAG    | Forward (5'-3')        | GATTTGCAGCAGGTCTCCGACATAGCTGCTTATGC     |
|                         |               | Reverse (5'-3')        | GCATAAGCAGCTATGTCCGAGACCTGCTGCAAAT<br>C |

|                            |            |                 |                                      |
|----------------------------|------------|-----------------|--------------------------------------|
| p18 R84D                   | pcDNA-FLAG | Forward (5'-3') | CATGAGTACATGGACGATGCCAGGCAGTACAGC    |
|                            |            | Reverse (5'-3') | GCTGTACTGCCTGGCATCGTCCATGTACTCATG    |
| p18 Y88D                   | pcDNA-FLAG | Forward (5'-3') | GGACCGTGCCAGGCAGGACAGCACCCGCTTGGC    |
|                            |            | Reverse (5'-3') | GCCAAGCGGGTGCTGTCTGCCTGGCACGGTCC     |
| p18 L92D                   | pcDNA-FLAG | Forward (5'-3') | GCAGTACAGCACCCGCGACGCTGTGCTGAGCAG    |
|                            |            | Reverse (5'-3') | CTGCTCAGCACAGCGTCGCGGGTGCTGTACTGC    |
| p18 R84D/Y88D              | pcDNA-FLAG | Forward (5'-3') | CATGAGTACATGGACGATGCCAGGCAGGACAGC    |
|                            |            | Reverse (5'-3') | GCTGTCTGCCTGGCATCGTCCATGTACTCATG     |
| p18 R84D/Y88D/L92D         | pcDNA-FLAG | Forward (5'-3') | GCAGGACAGCACCCGCGACGCTGTGCTGAGCAG    |
|                            |            | Reverse (5'-3') | CTGCTCAGCACAGCGTCGCGGGTGCTGTCTGC     |
| p18 R84D/Y88D/L92D/L95D    | pcDNA-FLAG | Forward (5'-3') | CACCCGCGACGCTGTGGATAGCAGCAGCCTGACC   |
|                            |            | Reverse (5'-3') | GGGTCAGGCTGCTGCTATCCACAGCGTCGCGGGTG  |
| p18 D49A/E50A              | pcDNA-FLAG | Forward (5'-3') | CTTCCGCTCGCACTGCTGCGCAGGCCCTGCTCTC   |
|                            |            | Reverse (5'-3') | GAGAGCAGGGCCTGCGCAGCAGTGCAGCGGAAG    |
| p18 I57D/L58D              | pcDNA-FLAG | Forward (5'-3') | GCCCTGCTCTTTCCGACGATGCCAAGACAGCCAGC  |
| p18 I57D/L58D-Mito         | pmRFP-C1   | Reverse (5'-3') | GCTGGCTGTCTTGGCATCGTCGGAAGAGAGCAGGGC |
| p18 <sup>49-161</sup>      | pcDNA-FLAG | Forward (5'-3') | CGCGGATCCTGGATGAGCAGGCCCTGCTCTC      |
|                            |            | Reverse (5'-3') | CCGCTCGAGTCATGGTATCCCAAACCTGTAC      |
| GST-p18 <sup>14-48</sup>   | pcDNA-FLAG | Forward (5'-3') | CGCGGATCCTGAACACTAGTAGCAATTCCATGTCC  |
|                            |            | Reverse (5'-3') | CCGCTCGAGTTAAGTGCAGCGGAAGGCAG        |
| GST-p18 <sup>76-145</sup>  | pcDNA-FLAG | Forward (5'-3') | CGCGGATCCTGAACACTAGTAGCAATTCCATGTCC  |
|                            |            | Reverse (5'-3') | CCGCTCGAGTTACTGAGAAAGTGCCTGTAG       |
| GST-p18 <sup>14-128</sup>  | pcDNA-FLAG | Forward (5'-3') | CGCGGATCCTGAACACTAGTAGCAATTCCATGTCC  |
|                            |            | Reverse (5'-3') | CCGCTCGAGTTAATCAGAGAACGGGATGGG       |
| GST-p18 <sup>14-107</sup>  | pcDNA-FLAG | Forward (5'-3') | CGCGGATCCTGAACACTAGTAGCAATTCCATGTCC  |
|                            |            | Reverse (5'-3') | CCGCTCGAGCTACGGTGGCAGCTTCTTCC        |
| GST-p18 <sup>108-161</sup> | pcDNA-FLAG | Forward (5'-3') | CGCGGATCCTGAACACTAGTAGCAATTCCATGTCC  |
|                            |            | Reverse (5'-3') | CCGCTCGAGTCATGGTATCCCAAACCTGTAC      |
| GST-p18 <sup>108-145</sup> | pcDNA-FLAG | Forward (5'-3') | CGCGGATCCTGAACACTAGTAGCAATTCCATGTCC  |
|                            |            | Reverse (5'-3') | CCGCTCGAGTTACTGAGAAAGTGCCTGTAG       |

|                                  |            |                 |                                                  |
|----------------------------------|------------|-----------------|--------------------------------------------------|
| p18 <sup>63-161</sup>            | pcDNA-FLAG | Forward (5'-3') | CGCGGATCCTGATGGCCAGCAACATCATTGATG                |
|                                  |            | Reverse (5'-3') | CCGCTCGAGTCATGGTATCCCAAACCTGTAC                  |
| GST-p18 <sup>14-75</sup>         | pcDNA-FLAG | Forward (5'-3') | CGCGGATCCTGAACACTAGTAGCAATTCCATGTCC              |
|                                  |            | Reverse (5'-3') | CCGCTCGAGCTAGCCCTGTGAGTCTGCAGC                   |
| Mito                             | pmRFP-C1   | Forward (5'-3') | CCGCTCGAGCTATGCATCGAGGCGACGGAG                   |
|                                  |            | Reverse (5'-3') | CGCGGATCCTCAGAGCTGCTTTCGGTATCTCACG               |
| p18 <sup>14-161</sup> -Mito      | pmRFP-C1   | Forward (5'-3') | CCGCTCGAGCTCAGGACCGAGAGGAGCGG                    |
|                                  |            | Reverse (5'-3') | CGCGGATCCTCAGAGCTGCTTTCGGTATCTCACG               |
| GST-p18 <sup>108-161</sup> -Mito | pmRFP-C1   | Forward (5'-3') | CCGCTCGAGCTAACACTAGTAGCAATTCCATG                 |
|                                  |            | Reverse (5'-3') | CGCGGATCCTCAGAGCTGCTTTCGGTATCTCACG               |
| GST-p18 <sup>14-128</sup> -Mito  | pmRFP-C1   | Forward (5'-3') | CCGCTCGAGCTAACACTAGTAGCAATTCCATG                 |
|                                  |            | Reverse (5'-3') | CGCGGATCCTCAGAGCTGCTTTCGGTATCTCACG               |
| GST-p18 <sup>76-145</sup> -Mito  | pmRFP-C1   | Forward (5'-3') | CCGCTCGAGCTAACACTAGTAGCAATTCCATG                 |
|                                  |            | Reverse (5'-3') | CGCGGATCCTCAGAGCTGCTTTCGGTATCTCACG               |
| CASTOR1                          | pcDNA-FLAG | Forward (5'-3') | CGCGGATCCTGATGGAGCTGCACATCCTAGAAC                |
|                                  |            | Reverse (5'-3') | CCGCTCGAGTCAGGAAGCCAGGCCTTC                      |
| MP1                              | pcDNA-Myc  | Forward (5'-3') | ATAAGAATGCGGCCGCATGGCGGATGACCTAAAGC              |
|                                  |            | Reverse (5'-3') | CCGCTCGAGTTAAGAACTTCCACAACCTTGTC                 |
| MP1 L102D                        | pcDNA-Myc  | Forward (5'-3') | GTGCCAATACAGGAGATATTGTCAGCCTAGAAAAAG             |
|                                  |            | Reverse (5'-3') | CTTTTCTAGGCTGACAATATCTCCTGTATTGGCAC              |
| MP1 E42A/H43A/R46A               | pcDNA-Myc  | Forward (5'-3') | CAAATGACAATGCTCCAGCGGCTGCTTTGGCACCTGGTTTCTT      |
|                                  |            | Reverse (5'-3') | AAGAAACCAGGTGCCAAAGCAGCCGCTGGAGCATTGTCATTTG      |
| MP1 L55D/D58A                    | pcDNA-Myc  | Forward (5'-3') | CCACTTTTGCCGATGCAACAGCCCAAGGAAGCAAAC             |
|                                  |            | Reverse (5'-3') | GTTTGCTTCTTGGGCTGTTGCATCGGCAAAAAGTGG             |
| MP1 Q59A/K62D                    | pcDNA-Myc  | Forward (5'-3') | CAACAGACGCAGGAAGCGATCTTGGACTTTCC                 |
|                                  |            | Reverse (5'-3') | GGAAAGTCCAAGATCGCTTCTGCGTCTGTTG                  |
| MP1                              | pcDNA-HA   | Forward (5'-3') | GATACCCCTACGACGTCCCCGACTACGCCATGGCGGATGACCTAAAGC |
|                                  |            | Reverse (5'-3') | CCGCTCGAGTTAAGAACTTCCACAACCTTGTC                 |
| MP1                              | pEGFP-N3   | Forward (5'-3') | CCGCTCGAGCTATGGCGGATGACCTAAAGC                   |
|                                  |            | Reverse (5'-3') | CGCGGATCCAGAACTTCCACAACCTTGTC                    |

|                           |            |                 |                                                 |
|---------------------------|------------|-----------------|-------------------------------------------------|
| GST-p14                   | pcDNA-Myc  | Forward (5'-3') | CCGGAATTCTAACACTAGTAGCAATTCATGTCC               |
|                           |            | Reverse (5'-3') | CCGCTCGAGTTAAGATGCCGCCACTTGGG                   |
| p14 M103D                 | pcDNA-Myc  | Forward (5'-3') | GACCGTGGGCTTTGGAGACCTCAAGGCCAAGGC               |
|                           |            | Reverse (5'-3') | GCCTTGGCCTTGAGGTCTCCAAAGCCCACGGTC               |
| p14 D41A/R43 A            | pcDNA-Myc  | Forward (5'-3') | GTTACGGGGACACTGCCGCCGGTCAACCGCTGCC ATAG         |
|                           |            | Reverse (5'-3') | CTATGGCAGCGGTGACCGCGGCGGCAGTGTCCCC GTAAC        |
| p14 V44D/A47 D            | pcDNA-Myc  | Forward (5'-3') | CTGACGCCCCGGGACACCGCTGACATAGCCAGTAA CATC        |
|                           |            | Reverse (5'-3') | GATGTTACTGGCTATGTGTCAGCGGTGTCCCGGGCGT CAG       |
| p14 R58A/N59 A/N61A/Q6 2A | pcDNA-Myc  | Forward (5'-3') | GGCCGCCTACGACGCGGCCGGGGCCGCAGCGTTT AATG         |
|                           |            | Reverse (5'-3') | CATTAAACGCTGCGGCCCGGCCGCGTCGTAGGC GGCC          |
| p14                       | pcDNA-Myc  | Forward (5'-3') | ATAAGAATGCGCCGCATGCTGCGCCCCAAGGCT TTG           |
|                           |            | Reverse (5'-3') | CCGCTCGAGTTAAGATGCCGCCACTTGGG                   |
| p14                       | pcDNA-HA   | Forward (5'-3') | GATACCCCTACGACGTCCCCGACTACGCCATGCTG CGCCCCAAGGC |
|                           |            | Reverse (5'-3') | CCGCTCGAGTTAAGATGCCGCCACTTGGG                   |
| p14-Mito                  | pmRFP-C1   | Forward (5'-3') | CCGCTCGAGCTATGCTGCGCCCCAAGGC                    |
|                           |            | Reverse (5'-3') | CGCGGATCCTCAGAGCTGCTTTCGGTATCTCACG              |
| HBXIP                     | pcDNA-Myc  | Forward (5'-3') | CCGGAATTCTATGGAGCCAGGTGCAGGTC                   |
|                           |            | Reverse (5'-3') | CCGCTCGAGTCAAGAGGCCATTTTGTGCAC                  |
| HBXIP L113R               | pcDNA-Myc  | Forward (5'-3') | CACAAGGACTTAATCGGGGTTGCCGCGGGACCC               |
|                           |            | Reverse (5'-3') | GGGTCCCGCGGCAACCCGATTAAGTCCTTGTG                |
| HBXIP                     | pcDNA-HA   | Forward (5'-3') | CGCGGATCCATGGAGCCAGGTGCAGGTC                    |
|                           |            | Reverse (5'-3') | CCGCTCGAGTCAAGAGGCCATTTTGTGCAC                  |
| C7orf59                   | pcDNA-Myc  | Forward (5'-3') | CCGGAATTCTATGACTTCTGCGCTGACCC                   |
|                           |            | Reverse (5'-3') | CCGCTCGAGTCAGACATCAATGGGCTCCC                   |
| C7orf59                   | pcDNA-FLAG | Forward (5'-3') | CGCGGATCCTGATGACTTCTGCGCTGACCC                  |
|                           |            | Reverse (5'-3') | CCGCTCGAGTCAGACATCAATGGGCTCCC                   |
| C7orf59                   | pcDNA-HA   | Forward (5'-3') | CGCGGATCCATGACTTCTGCGCTGACCC                    |
|                           |            | Reverse (5'-3') | CCGCTCGAGTCAGACATCAATGGGCTCCC                   |



|                       |           |                 |                                                    |
|-----------------------|-----------|-----------------|----------------------------------------------------|
| C7orf59-Mito          | pmRFP-C1  | Forward (5'-3') | CCGCTCGAGCTATGACTTCTGCGCTGACCC                     |
|                       |           | Reverse (5'-3') | CGCGGATCCTCAGAGCTGCTTTCGGTATCTCACG                 |
| RagA                  | pcDNA-Myc | Forward (5'-3') | ATAAGAATGCGGCCGCATGCCAAATACAGCCATG AAG             |
|                       |           | Reverse (5'-3') | CCGCTCGAGTCAACGCATAAGGAGACTGTGC                    |
| RagA T21N             | pcDNA-Myc | Forward (5'-3') | GCGGGTCGGGGAAGAACAGCATGAGGTTCGATAAT C              |
|                       | pEGFP-C3  | Reverse (5'-3') | GATTATCGACCTCATGCTGTTCTTCCCCGACCCGC                |
| RagA Q66L             | pcDNA-Myc | Forward (5'-3') | GTGGGACTGTGGCGGTCTGGACACCTTCATGG                   |
|                       | pEGFP-C3  | Reverse (5'-3') | CCATGAAGGTGTCCAGACCGCCACAGTCCCAC                   |
| RagA G domain         | pcDNA-Myc | Forward (5'-3') | GTCTACCAGCTGATTTAGAACGTTTCAGCAGCTGG                |
|                       |           | Reverse (5'-3') | CCAGCTGCTGAACGTTCTAAATCAGCTGGTAGAC                 |
| RagA Roadblock domain | pcDNA-Myc | Forward (5'-3') | CATTTCTGAAGAGGACTTGAATTCTATGCCCAACG TTCAGCAGCTGGAG |
|                       |           | Reverse (5'-3') | GGGCCCTCTAGATGCATGCTCGAGTCAACGCATAA GGAGACTG       |
| RagA                  | pEGFP-C3  | Forward (5'-3') | CCGCTCGAGATGCCAAATACAGCCATGAAG                     |
|                       |           | Reverse (5'-3') | CGCGGATCCTCAACGCATAAGGAGACTGTGC                    |
| RagA G domain         | pEGFP-C3  | Forward (5'-3') | GTCTACCAGCTGATTTAGAACGTTTCAGCAGCTGG                |
|                       |           | Reverse (5'-3') | CCAGCTGCTGAACGTTCTAAATCAGCTGGTAGAC                 |
| RagA Roadblock domain | pEGFP-C3  | Forward (5'-3') | CCGCTCGAGATGCCCAACGTTTCAGCAGCTGGAG                 |
|                       |           | Reverse (5'-3') | CGCGGATCCTCAACGCATAAGGAGACTGTGC                    |
| RagC                  | pcDNA-Myc | Forward (5'-3') | ATAAGAATGCGGCCGCATGTCCCTGCAGTACGGG G               |
|                       |           | Reverse (5'-3') | CCGCTCGAGCTAGATGGCGTTTCGTGGCG                      |
| RagC S75N             | pcDNA-Myc | Forward (5'-3') | CGGCGCAGCGGCAAGAACTCCATCCAGAAGGTG                  |
|                       |           | Reverse (5'-3') | CACCTTCTGGATGGAGTTCTTGCCGCTGCGCCG                  |
| RagC Q120L            | pcDNA-Myc | Forward (5'-3') | GATATGGGATTTTCTGGGCTAATGGACTTTTTTTG                |
|                       |           | Reverse (5'-3') | CAAAAAAGTCCATTAGCCCAGGAAAATCCCATAT C               |
| RagC G domain         | pcDNA-Myc | Forward (5'-3') | GGTGCAGAACTCATTTGACAACCTGCCGACCTTG                 |
|                       |           | Reverse (5'-3') | CAAGGTCGGCAGTTGTCAAATGAGTTTCTGCACC                 |
| RagC Roadblock domain | pcDNA-Myc | Forward (5'-3') | CCGGAATTCTATGCCACAACCTGCCGACCTTGG                  |
|                       |           | Reverse (5'-3') | CCGCTCGAGCTAGATGGCGTTTCGTGGCG                      |
| C17orf59              | pcDNA-Myc | Forward (5'-3') | CCGGAATTCTATGGAGTCGTCTCGGGGGC                      |
|                       |           | Reverse (5'-3') | CCGCTCGAGTCACTTGCACAGGGCCTCCAAC                    |

### Supplementary References

1. Gouet, P., Courcelle, E., Stuart, D.I. & Metz, F. ESPript: analysis of multiple sequence alignments in PostScript. *Bioinformatics* **15**, 305-8 (1999).
2. Yachdav, G. et al. PredictProtein--an open resource for online prediction of protein structural and functional features. *Nucleic Acids Res.* **42**, W337-43 (2014).
3. Kurzbauer, R. et al. Crystal structure of the p14/MP1 scaffolding complex: How a twin couple attaches mitogen-activated protein kinase signaling to late endosomes. *Proc. Natl. Acad. Sci. USA* **101**, 10984-10989 (2004).
